# Supplementary material
Source: PubMed Central journal article supplement (PMC11189814)

**a****Juvenile social isolation (j-SI)**weaning **isolation** re-group housed

P21

P35

2M

↓  
Behavior  
Gene expression**Group-housed (GH)**weaning **group housed**

P21

P35

2M

**b****Open field**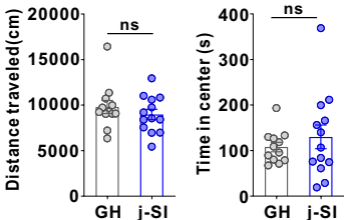**c*****Bdnf* expression (RT-qPCR)****Cortex****mPFC**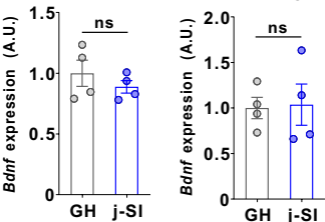

Supplement: 41380_2024_2413_MOESM1_ESM.pdf [file 41380_2024_2413_MOESM1_ESM.pdf]
