# Supplementary material
Source: PubMed Central journal article supplement (PMC11189814)

**a**

### Wnt signaling pathway-related genes (KEGG pathway)

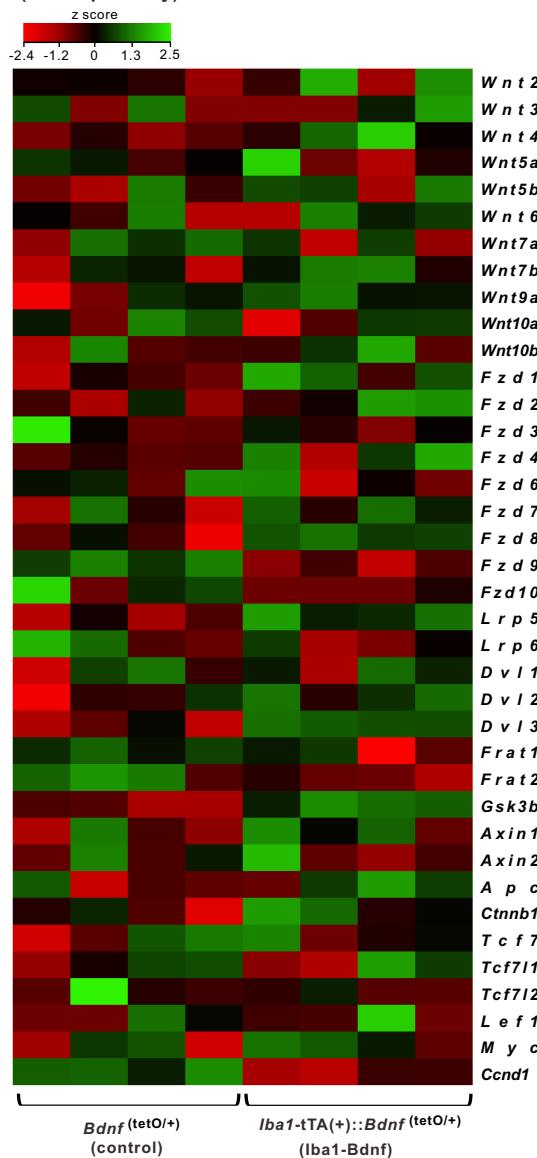**b**

### Neurotrophic factor and cytokine genes

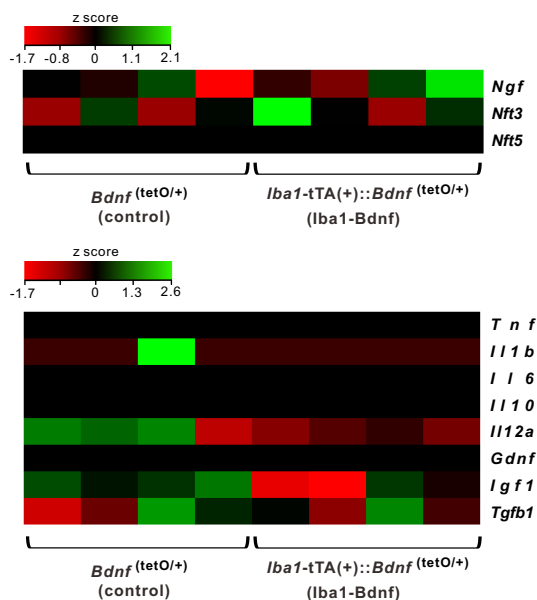**c**

### Complement system-related gene expression in Microglia (RT-qPCR)

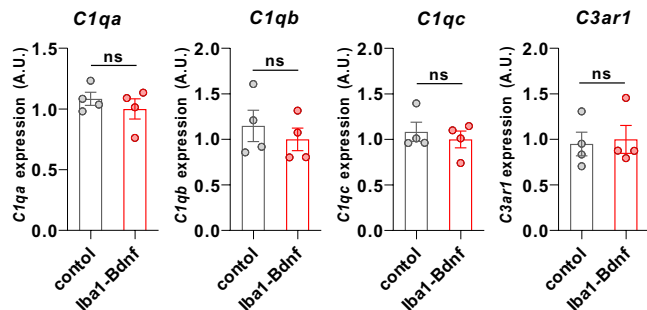

Supplement: 41380_2024_2413_MOESM3_ESM.pdf [file 41380_2024_2413_MOESM3_ESM.pdf]
