# Supplementary material
Source: PubMed Central journal article supplement (PMC11189814)

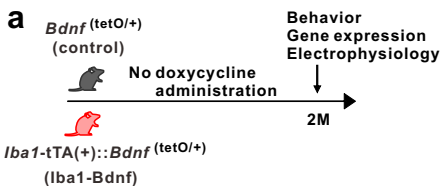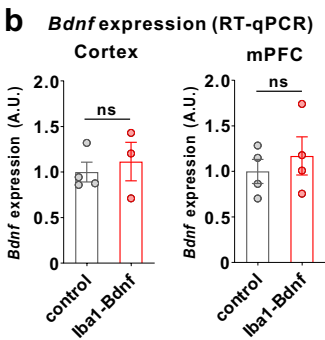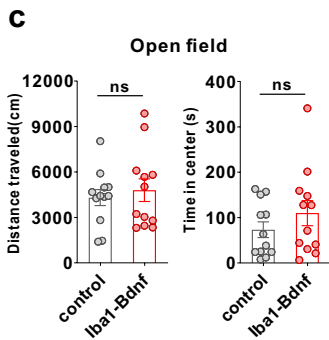

posterior paraventricular thalamus

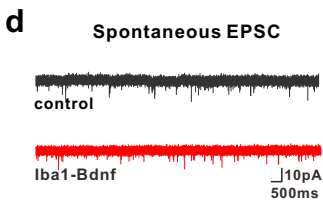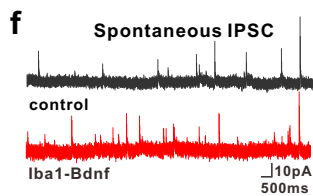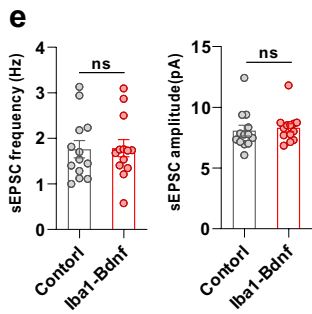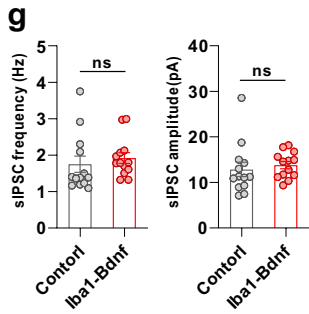

Supplement: 41380_2024_2413_MOESM2_ESM.pdf [file 41380_2024_2413_MOESM2_ESM.pdf]

*Bdnf* (tetO/+)

(control)

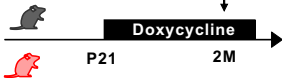

*Iba1-tTA(+):Bdnf* (tetO/+)  
(Iba1-Bdnf)

### Open field

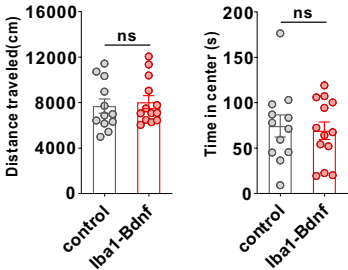

Supplement: 41380_2024_2413_MOESM4_ESM.pdf [file 41380_2024_2413_MOESM4_ESM.pdf]

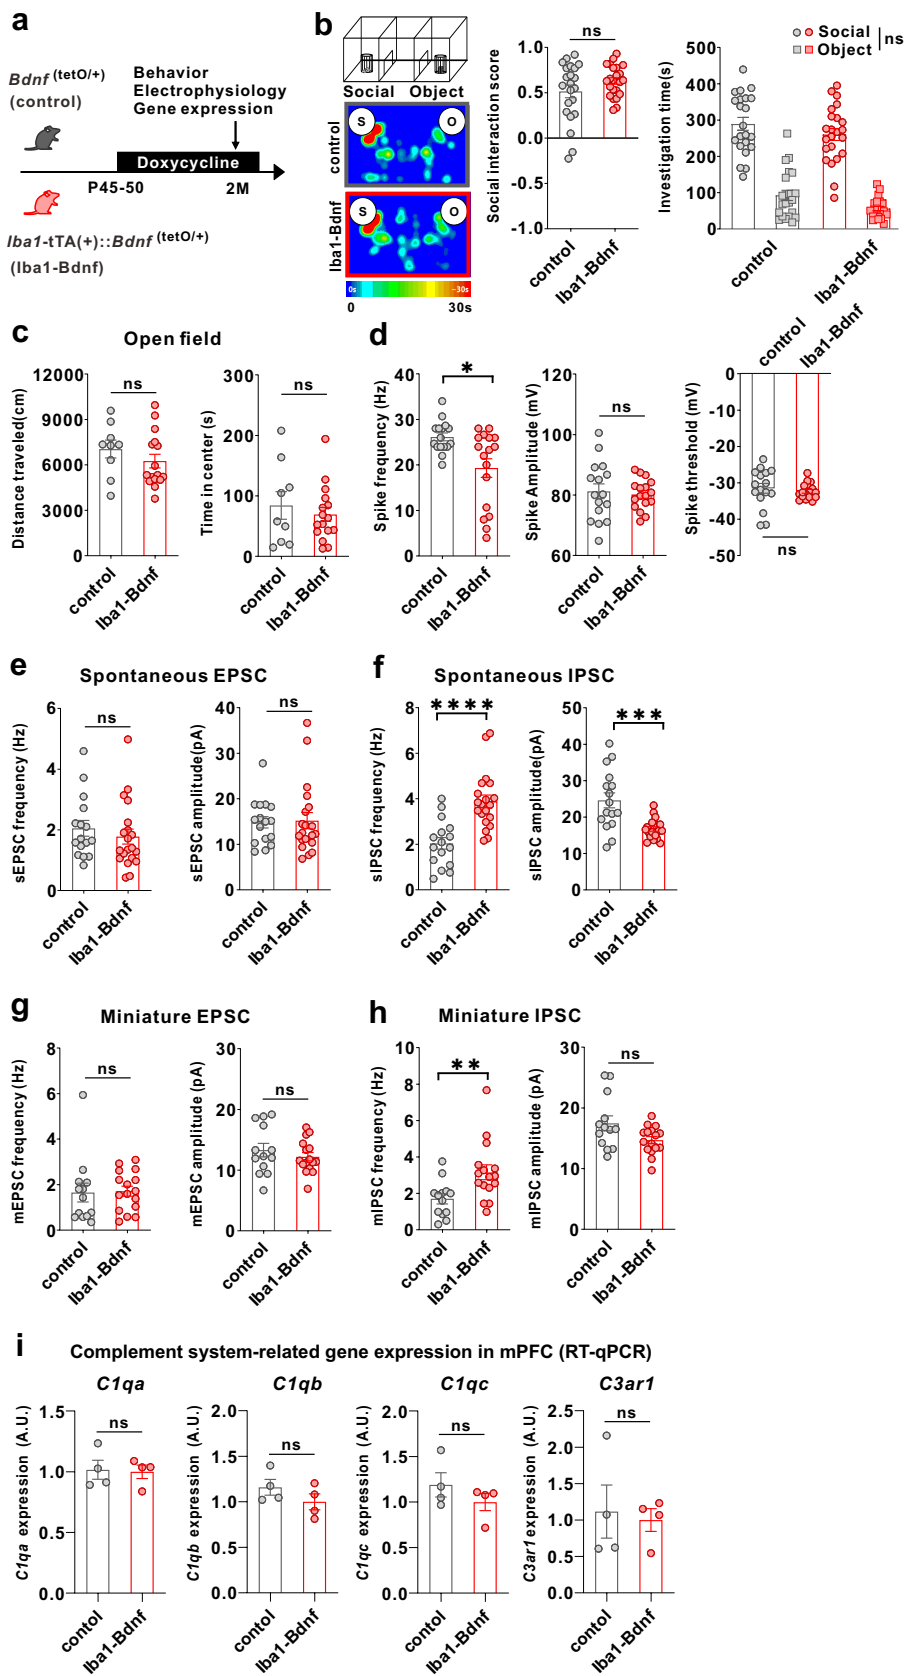

Supplement: 41380_2024_2413_MOESM5_ESM.pdf [file 41380_2024_2413_MOESM5_ESM.pdf]

**a** *Bdnf* mRNA expression

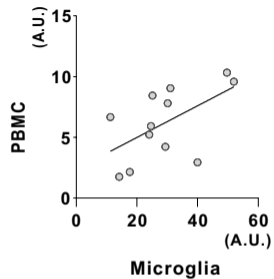

**b**

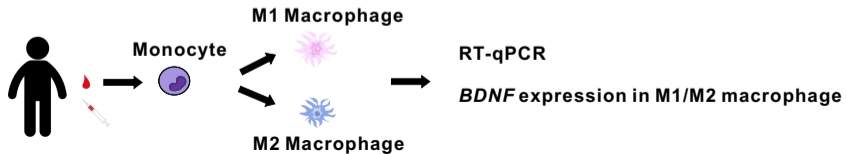

Supplement: 41380_2024_2413_MOESM6_ESM.pdf [file 41380_2024_2413_MOESM6_ESM.pdf]
